# Supplementary material for: Kinetic Modeling Study on the Combustion Characterization of Synthetic C3 and C4 Alcohols for Lean Premixed Prevaporized Combustion
Source: MDPI journal article supplement (doi:10.3390/en14175473), 2021-09-02
Supplement: s1 [file s1]

# Supplementary Material

## Kinetic modeling study on the combustion characterization of synthetic C3 and C4 alcohols for lean premixed prevaporized combustion

Solmaz Nadiri<sup>1,2\*</sup>, Paul Zimmermann<sup>2,3</sup>, Laxmi Sane<sup>1,2</sup>, Ravi Fernandes<sup>1,2</sup>, Friedrich Dinkelacker<sup>2,3</sup>, Bo Shu<sup>1,2</sup>

<sup>1</sup> Department of Physical Chemistry, Physikalisch-Technische Bundesanstalt, Braunschweig, Germany

<sup>2</sup> Cluster of Excellence SE2A—Sustainable and Energy-Efficient Aviation, Technische Universität Braunschweig, 38106 Braunschweig, Germany

<sup>3</sup> Institute of Technical Combustion, Leibniz University Hannover, An der Universität 1, 30823 Garbsen, Germany

\* Correspondence: Solmaz.nadiri@ptb.de

### Comparison between the original C4 mechanism and the developed C4 mechanism

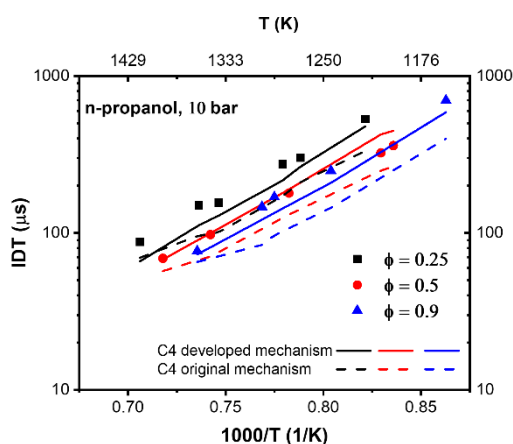

(a)

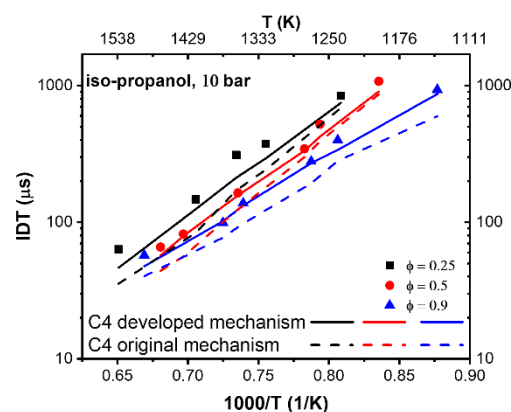

(b)

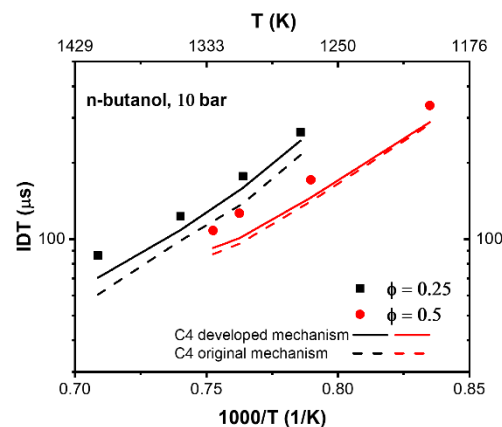

(c)

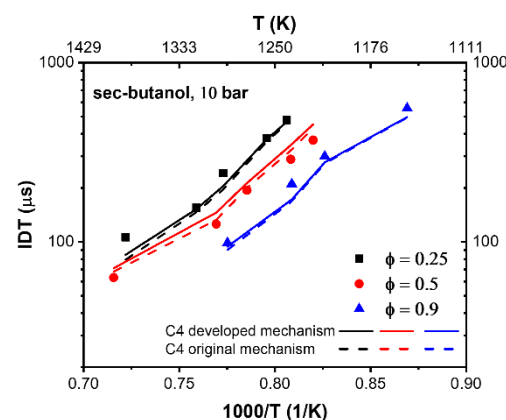

(d)

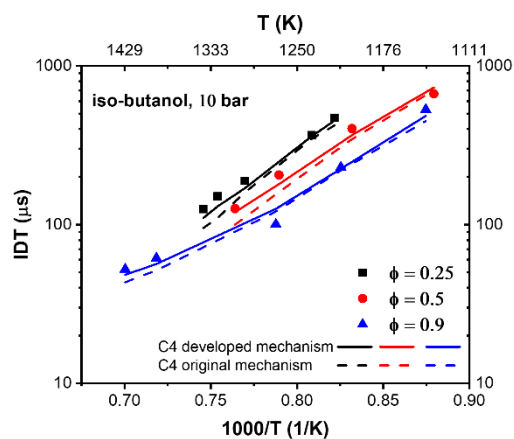

(e)

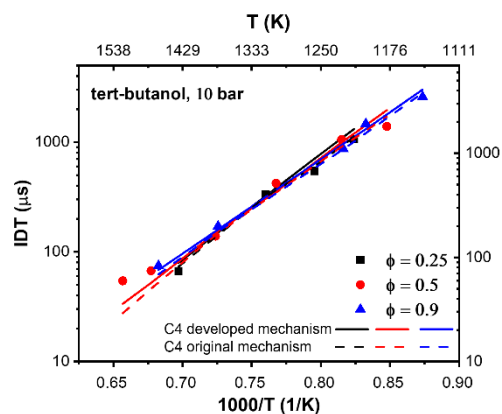

(f)

**Figure S1.** IDTs of (a) n-propanol, (b) iso-propanol, (c) n-butanol, (d) sec-butanol, (e) iso-butanol and (f) tert-butanol measured in the HPST at 10 bar and  $\phi = 0.25, 0.5$  and  $0.9$ . (Symbols: experimental points; Lines: model predictions)

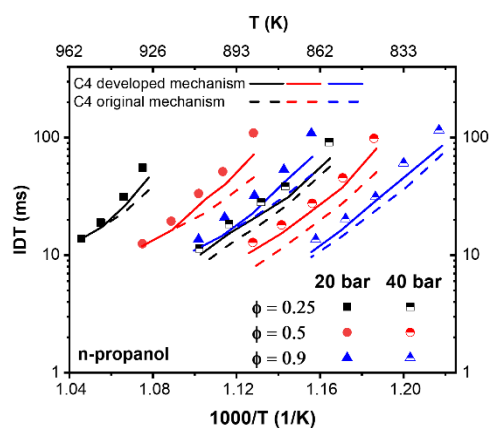

(a)

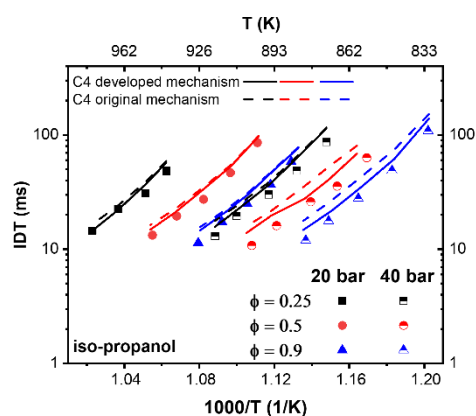

(b)

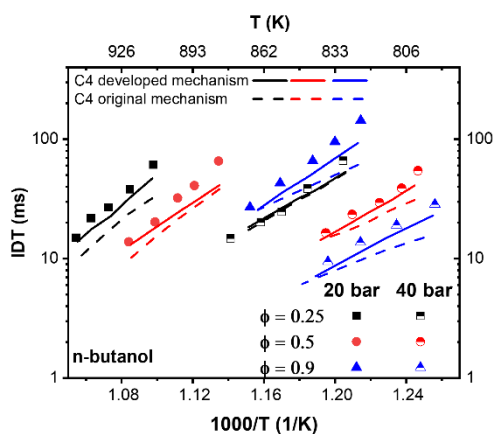

(c)

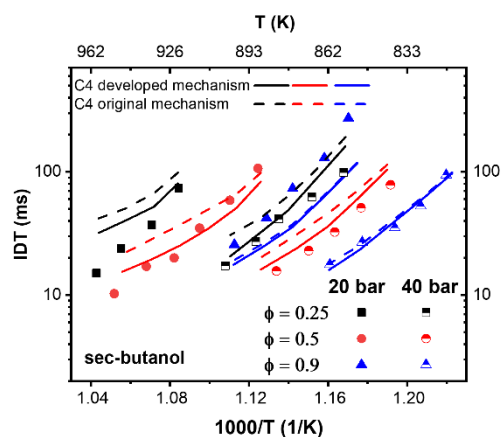

(d)

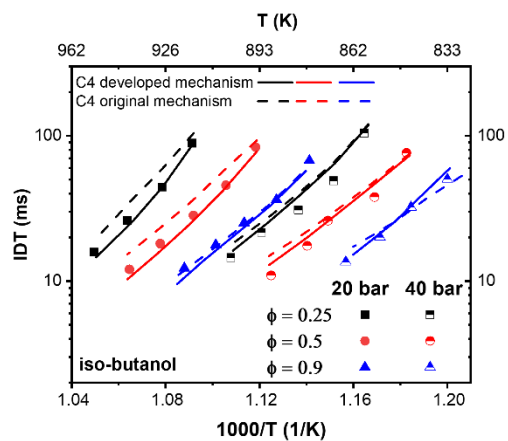

(e)

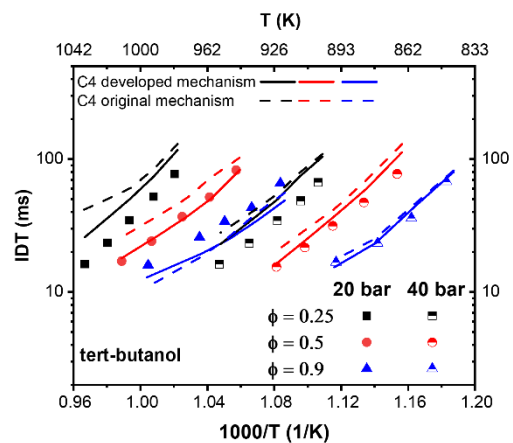

(f)

**Figure S2.** IDTs of (a) n-propanol, (b) iso-propanol, (c) n-butanol, (d) sec-butanol, (e) iso-butanol and (f) tert-butanol measured in the RCM at 20 and 40 bar and  $\phi = 0.25, 0.5$  and  $0.9$ . (Symbols: experimental points; Lines: model predictions)
